# Supplementary material
Source: publisher site journal article supplement (http://www.kjim.org/upload/media/kjim-2019-063-suppl5.pdf)
Supplement: Supplementary file 1 [file kjim-2019-063-suppl5.pdf]

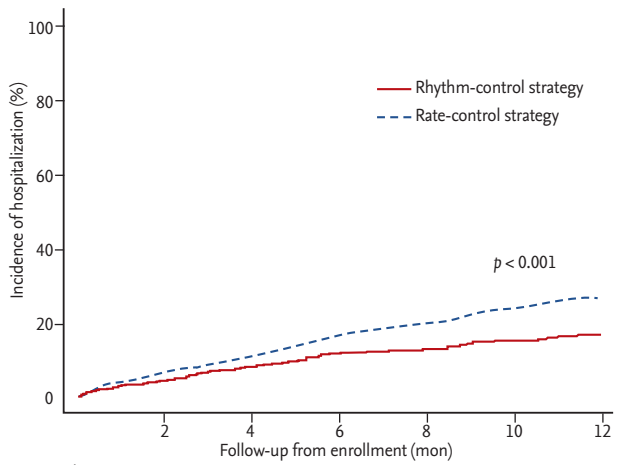

| No. at risk                    |     |     |     |     |     |     |  |
|--------------------------------|-----|-----|-----|-----|-----|-----|--|
| Group: Rhythm-control strategy |     |     |     |     |     |     |  |
| 900                            | 857 | 824 | 793 | 782 | 761 | 744 |  |
| Group: Rate-control strategy   |     |     |     |     |     |     |  |
| 900                            | 839 | 798 | 744 | 716 | 680 | 656 |  |

**Supplementary Figure 4.** Comparison of the cumulative occurrence of all-cause hospitalization between the rhythm and rate control strategies.
